# Supplementary material for: Comparison Between the Effects of Continuous and Intermittent Light-Intensity Aerobic Dance Exercise on Mood and Executive Functions in Older Adults
Source: PubMed Central journal article supplement (PMC8577647; doi:10.3389/fnagi.2021.723243), 2021-10-06
Supplement: Table_1.pdf [file Table_1.pdf]

**Supplementary Table 1. Stroop task performance in practice session**

|              | <i>n</i> = 15 | Practice |           |          |           | <i>t</i> | <i>p</i> -value | Cohen's <i>d</i> |
|--------------|---------------|----------|-----------|----------|-----------|----------|-----------------|------------------|
|              |               | first    |           | second   |           |          |                 |                  |
|              |               | <i>M</i> | <i>SD</i> | <i>M</i> | <i>SD</i> |          |                 |                  |
| AC [%]       |               |          |           |          |           |          |                 |                  |
| Neutral      |               | 99.8     | 0.9       | 98.7     | 1.7       | -2.65    | 0.02            | -0.68            |
| Incongruent  |               | 96.2     | 4.7       | 95.8     | 3.4       | -0.27    | 0.79            | -0.07            |
| RT [msec]    |               |          |           |          |           |          |                 |                  |
| Neutral      |               | 838.2    | 164.2     | 805.9    | 153.0     | -1.09    | 0.29            | -0.28            |
| Incongruent  |               | 1037.1   | 185.2     | 1028.5   | 226.2     | -0.33    | 0.75            | -0.09            |
| Interference |               | 198.9    | 109.7     | 222.5    | 117.0     | 0.73     | 0.47            | 0.19             |

AC; Accuracy, RT; reaction time, SD; standard deviation
